# Supplementary material for: First-principles investigation of ScX2 (X = Cl, Br, or I) monolayers for flexible spintronic and electronic applications
Source: Royal Society of Chemistry journal article supplement (doi:10.1039/d0cp02222e), 2020-01-01
Supplement: d0cp02222e1.pdf [file d0cp02222e1.pdf]

## Supporting information

First-principles investigation of  $\text{ScX}_2$  ( $X = \text{Cl}, \text{Br}$  or  $\text{I}$ ) monolayers for flexible  
spintronics and electronics

Wenzhou Chen<sup>\*a</sup>, Xiaobing Chen<sup>a</sup>, Yuzhen Wu<sup>a</sup>, Guishan Liu<sup>a</sup> and Hui Pan<sup>\*b,c</sup>

<sup>a</sup> School of Materials Science and Engineering, Dongguan University of Technology, Guangdong  
523808, China

<sup>b</sup> Joint Key Laboratory of the Ministry of Education, Institute of Applied Physics and Materials  
Engineering, University of Macau, Macau, China

<sup>c</sup> Department of Physics and Chemistry, Faculty of Science and Technology, University of Macau,  
Macao, China

\* Corresponding Authors: [chenwz@dgut.edu.cn](mailto:chenwz@dgut.edu.cn) (W. C.); [huipan@um.edu.mo](mailto:huipan@um.edu.mo) (H. P.)

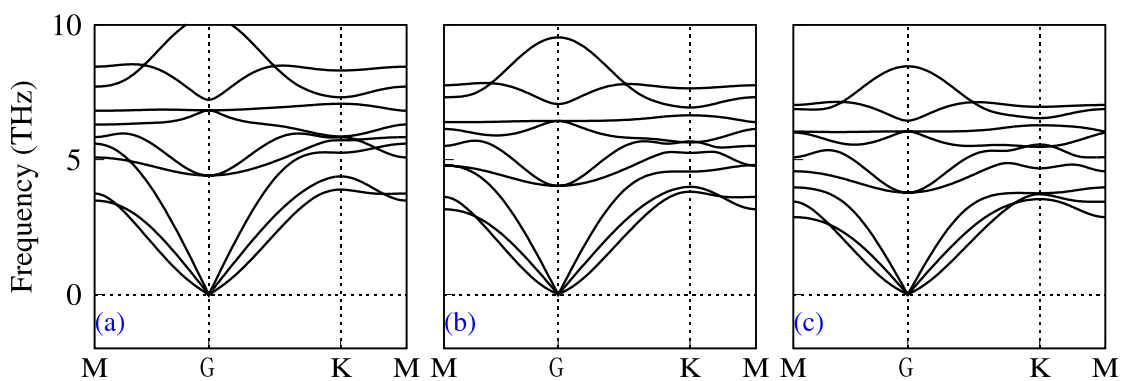

Figure S1. Phonon spectra for the (a) 1H-ScCl<sub>2</sub>, (b) 1H-ScBr<sub>2</sub>, (c) 1H-ScI<sub>2</sub>, respectively.

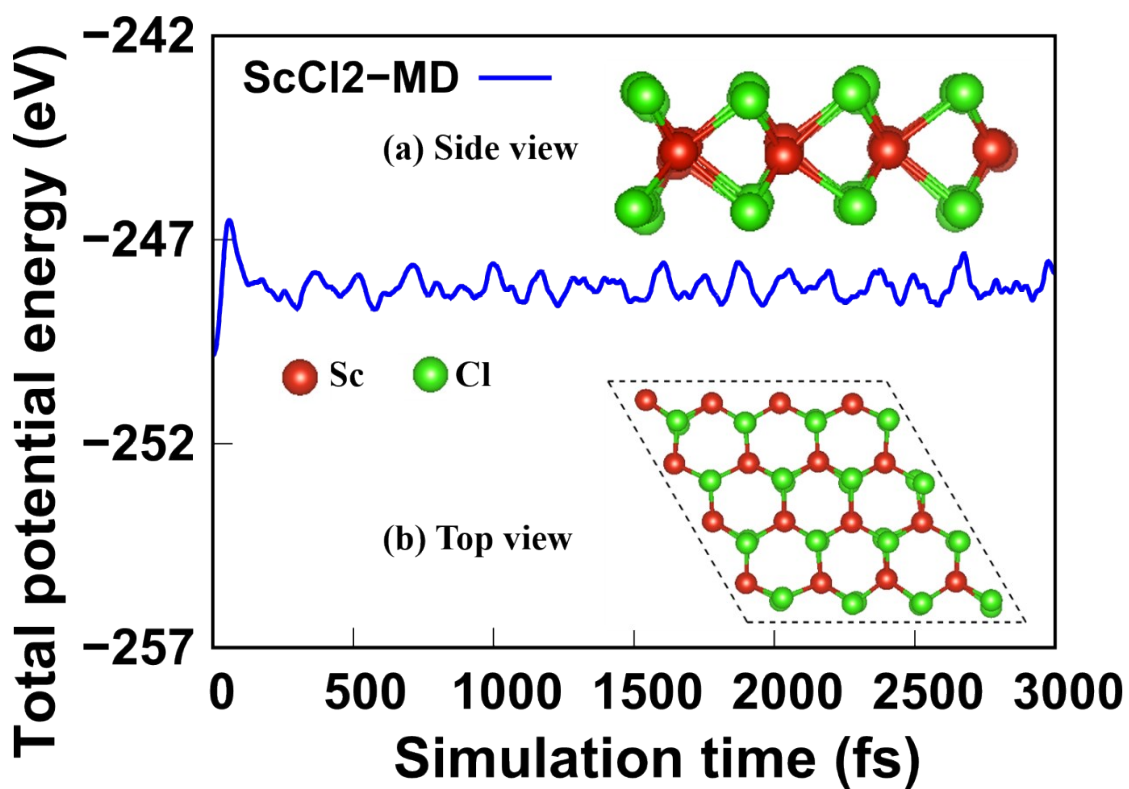

Figure S2. Potential energy of ScCl<sub>2</sub> monolayer as a function of time step within the canonical ensemble at T = 300 K.

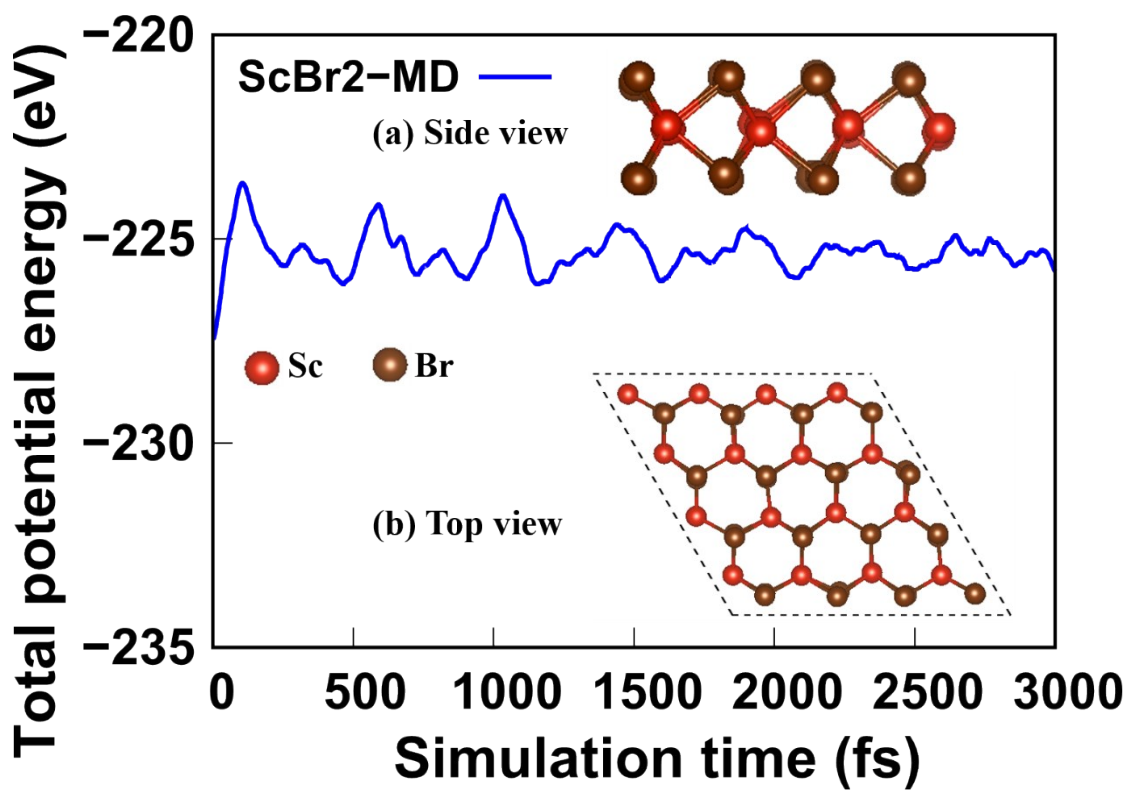

Figure S3. Potential energy of ScBr<sub>2</sub> monolayer as a function of time step within the canonical ensemble at T = 300 K.

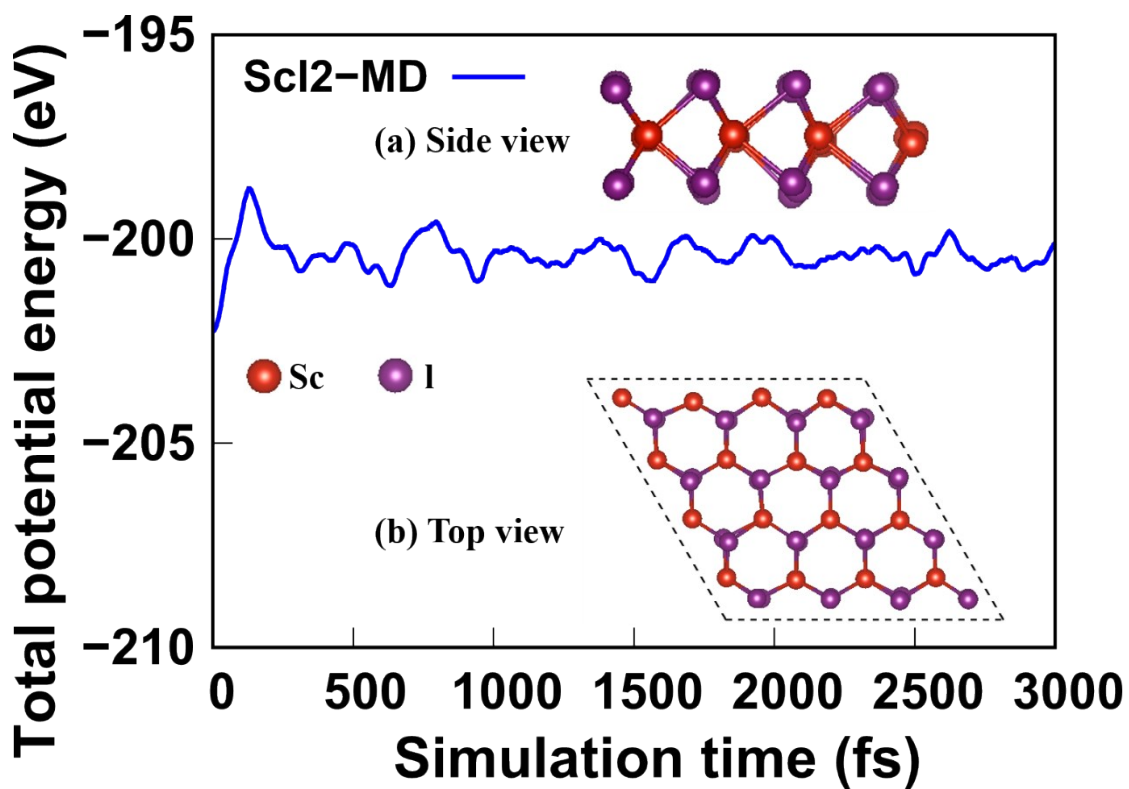

Figure S4. Potential energy of ScI<sub>2</sub> monolayer as a function of time step within the canonical ensemble at T = 300 K.

Table S1 Elastic constants for ScX<sub>2</sub> (X = Cl, Br or I) monolayers.

| Systems           | C <sub>11</sub> (N/m) | C <sub>12</sub> (N/m) | C <sub>44</sub> (N/m) |
|-------------------|-----------------------|-----------------------|-----------------------|
| ScCl <sub>2</sub> | 56                    | 14                    | 20                    |
| ScBr <sub>2</sub> | 50                    | 14                    | 18                    |
| ScI <sub>2</sub>  | 42                    | 10                    | 16                    |

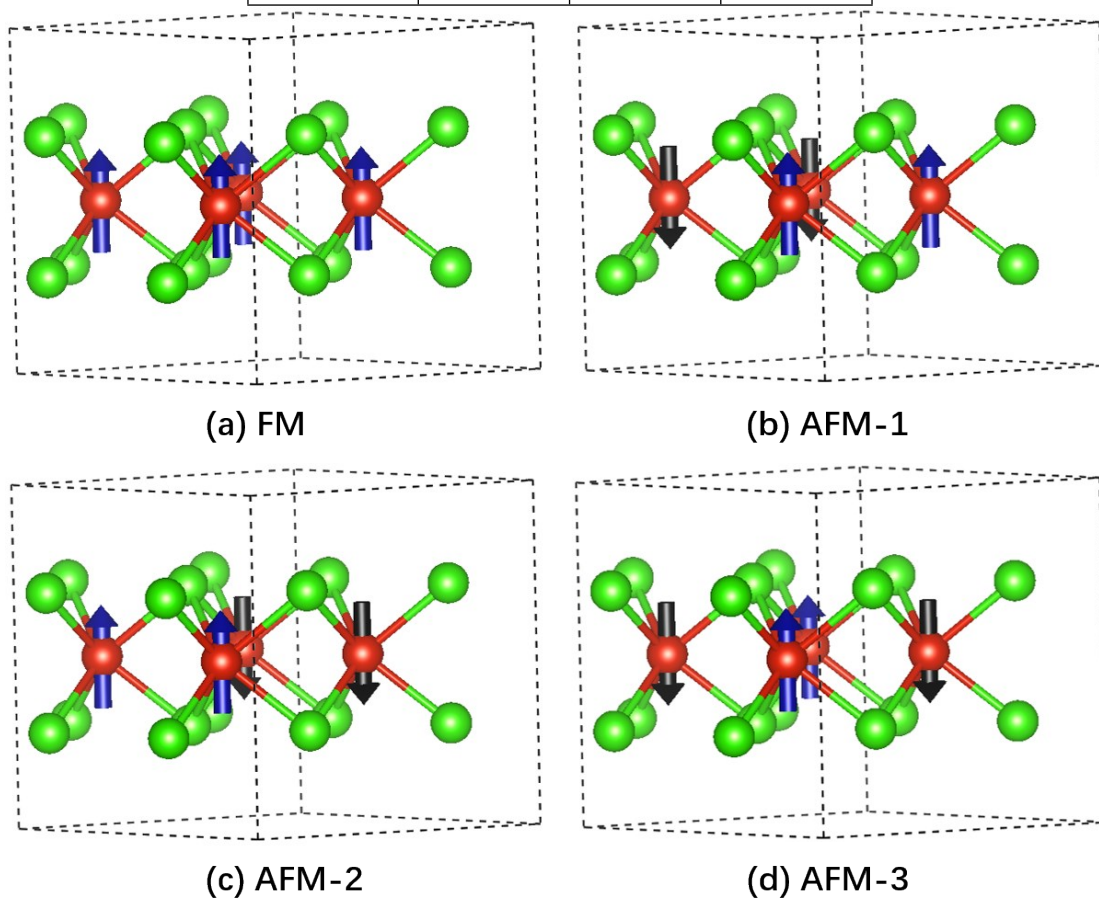

Figure S5. Configurations of the magnetic structures: (a) Ferromagnetic structure, (b) type-1 antiferromagnetic structure, (c) type-2 antiferromagnetic structure, and (d) type-3 antiferromagnetic structure.

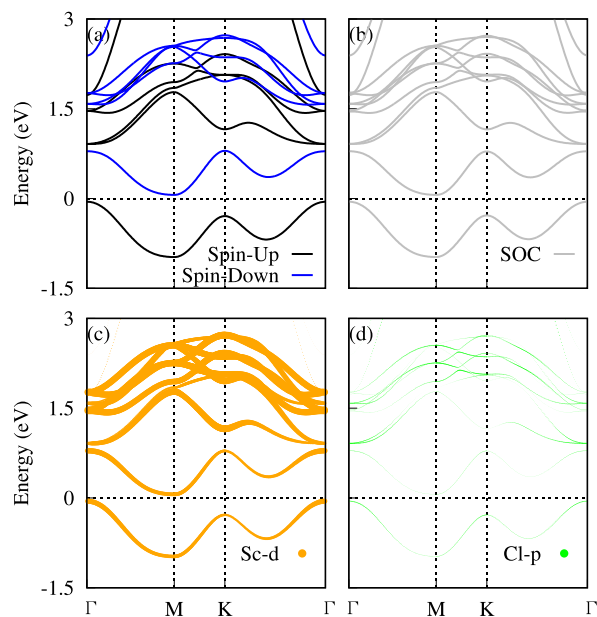

Figure S6. Calculated band structure of the  $\text{ScCl}_2$  monolayer: (a) without SOC effect; (b) with SOC effect; (c) contributions of the d orbitals of the Sc elements to the band structure; (d) contributions of the p orbitals of the Cl elements to the band structure.

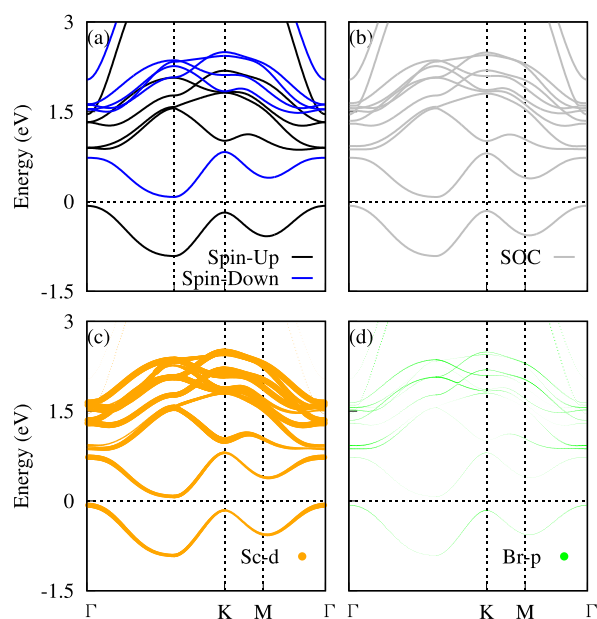

Figure S7. Calculated band structure of the  $\text{ScBr}_2$  monolayer: (a) without SOC effect; (b) with SOC effect; (c) contributions of the d orbitals of the Sc elements to the band structure; (d) contributions of the p orbitals of the Br elements to the band structure.

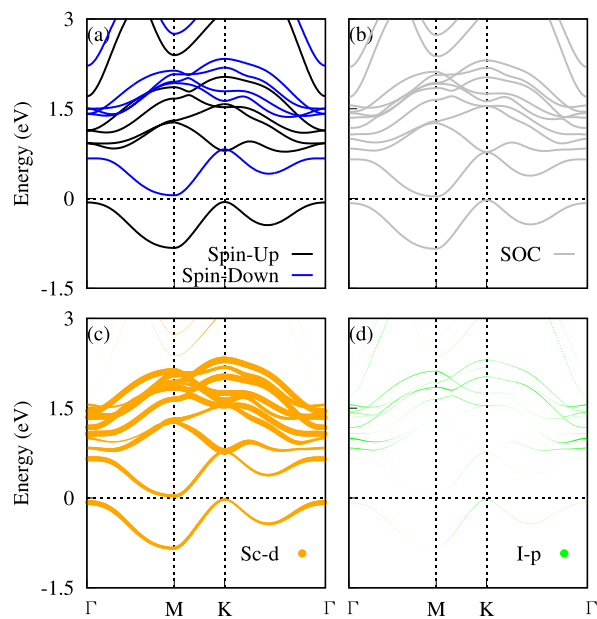

Figure S8. Calculated band structure of the  $\text{ScI}_2$  monolayer: (a) without SOC effect; (b) with SOC effect; (c) contributions of the d orbitals of the Sc elements to the band structure; (d) contributions of the p orbitals of the I elements to the band structure.

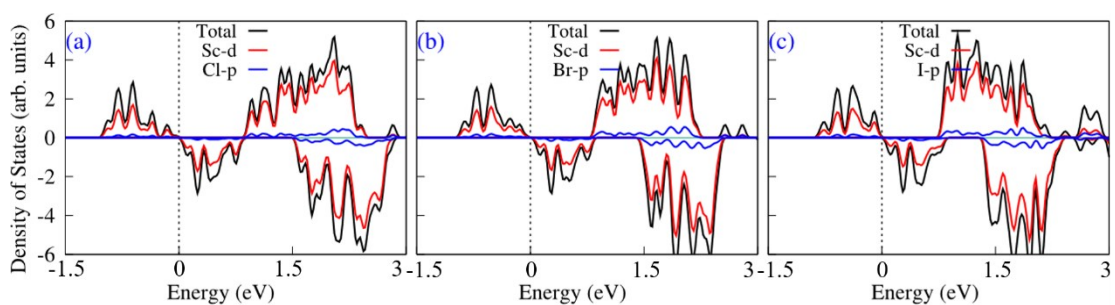

Figure S9. Partial and total density of states for the (a)  $\text{ScCl}_2$ , (b)  $\text{ScBr}_2$ , and (c)  $\text{ScI}_2$  monolayers, respectively.

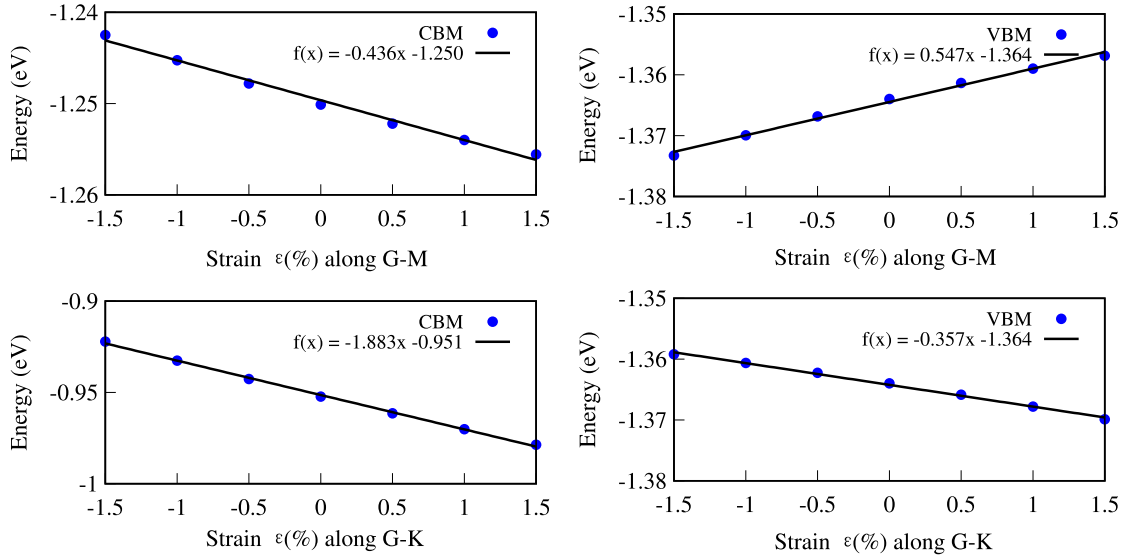

Figure S10. Band energies of the Conduction Band Minimum (CBM) and Valence Band Maximum (VBM) for  $\text{ScCl}_2$  monolayer, with respect to uniaxial compression or tension along the G-M and G-K directions, respectively. Blue points represent CBM or VBM, whereas black lines mean the fitting curves.

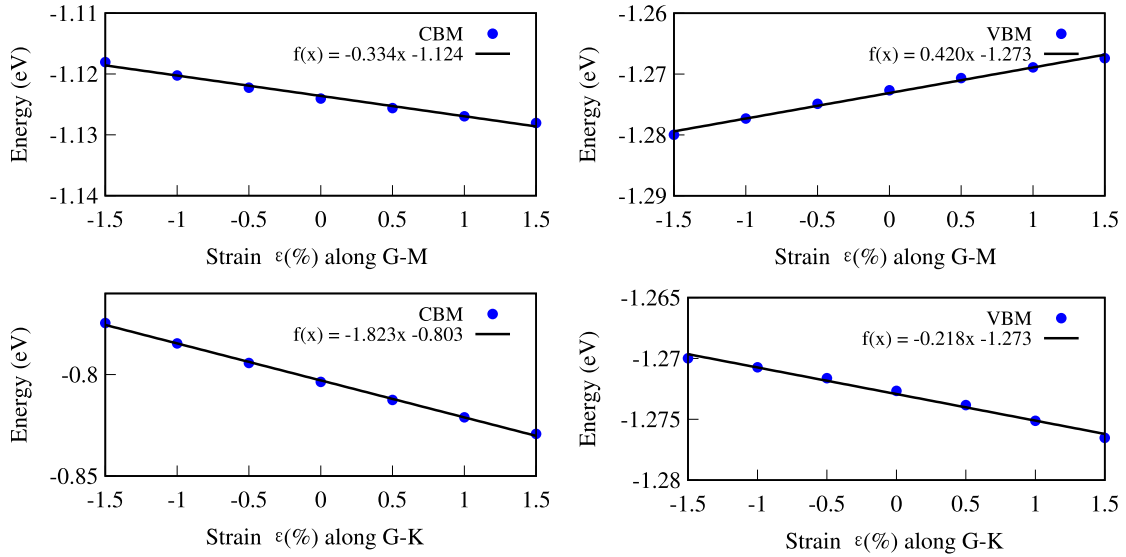

Figure S11. Band energies of the Conduction Band Minimum (CBM) and Valence Band Maximum (VBM) for  $\text{ScBr}_2$  monolayer, with respect to uniaxial compression or tension along the G-M and G-K directions, respectively. Blue points represent CBM or VBM, whereas black lines mean the fitting curves.

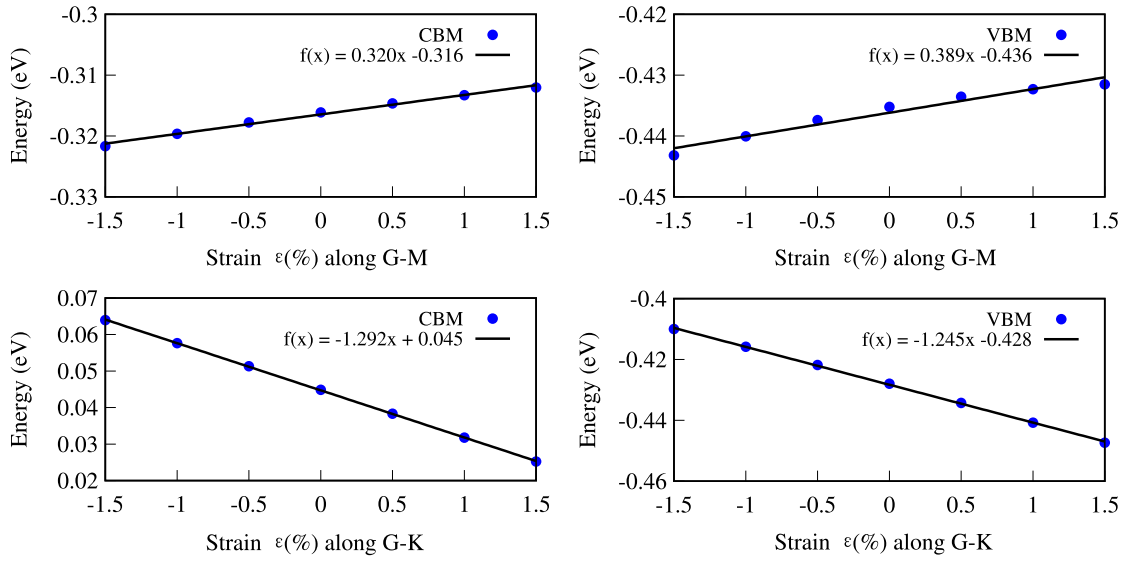

Figure S12. Band energies of the Conduction Band Minimum (CBM) and Valence Band Maximum (VBM) for ScI<sub>2</sub> monolayer, with respect to uniaxial compression or tension along the G-M and G-K directions, respectively. Blue points represent CBM or VBM, whereas black lines mean the fitting curves.
